# Supplementary material for: COVID-19 Vaccine: A Survey of Hesitancy in Patients with Celiac Disease
Source: MDPI journal article supplement (doi:10.3390/vaccines9050511), 2021-05-16
Supplement: s1 [file s1]

**Table 1.** Questionnaire.

|                                                                                                                                                                                                                       |
|-----------------------------------------------------------------------------------------------------------------------------------------------------------------------------------------------------------------------|
| A) Sociodemographic information and educational level, including gender, age, nationality, level of education, marital status, parental status and work activities, specifically if healthcare providers.             |
| B) Information regarding the course of celiac disease, in terms of disease subtype (e.g., refractory celiac disease, non-celiac gluten sensibility), illness duration, therapies and adherence to a gluten-free diet. |
| C) Lifestyle, health-related behaviors and attitudes, including smoking, physical activity, approach to screening services.                                                                                           |
| D) Knowledge and perceptions regarding vaccination and vaccine-preventable diseases.                                                                                                                                  |
| E) Vaccination history.                                                                                                                                                                                               |
| F) Sources of information on vaccines, such as general practitioner, the mass media, pharmacists.                                                                                                                     |
| G) Reports by people close to the respondent regarding vaccines and adverse events.                                                                                                                                   |
| H) Personal opinion regarding the association between celiac disease and COVID-19, in terms of risk of infection and disease severity.                                                                                |
| I) Personal opinion regarding the association between celiac disease and COVID-19 vaccines, perceived as increased risk of adverse events.                                                                            |
| J) Intention to get the COVID-19 vaccine.                                                                                                                                                                             |
